# Supplementary material for: Synchrospora gen. nov., a New Peronosporaceae Genus with Aerial Lifestyle from a Natural Cloud Forest in Panama
Source: MDPI journal article supplement (doi:10.3390/jof9050517), 2023-04-27
Supplement: s1 [file s1]

# *Synchrospora* gen. nov., a new Peronosporaceae genus with aerial lifestyle from a natural cloud forest in Panama

T. Jung <sup>1,2\*</sup>, Y. Balci <sup>3</sup>, K.D. Broders <sup>4,5</sup>, I. Milenković <sup>1,6</sup>, J. Janoušek <sup>1</sup>, T. Kudláček <sup>1</sup>, B. Đorđević <sup>1</sup> and M. Horta Jung <sup>1,2</sup>

- <sup>1</sup> Phytophthora Research Centre, Faculty of Forestry and Wood Technology, Mendel University in Brno, 613 00 Brno, Czech Republic; thomas.jung@mendelu.cz (T.J.); ivan.milenkovic@mendelu.cz (I.M.); josef.janousek@mendelu.cz (J.J.); tomas.kudlacek@mendelu.cz (T.K.); biljana.dordevic@mendelu.cz (B.D.); marilia.jung@mendelu.cz (M.H.J.)
- <sup>2</sup> Phytophthora Research and Consultancy, 83131 Nußdorf, Germany; dr.t.jung@gmail.com (T.J.)
- <sup>3</sup> USDA- APHIS Plant Protection and Quarantine, 4700 River Road, Riverdale, Maryland, 20737 USA; yilmaz.balci@usda.gov
- <sup>4</sup> Smithsonian Tropical Research Institute, Apartado Panamá, Panama City 0843-03092, Panama
- <sup>5</sup> USDA, Agricultural Research Service, National Center for Agricultural Utilization Research, Mycotoxin Prevention and Applied Microbiology Research Unit, Peoria, IL 61604, USA; kirk.broders@usda.gov
- <sup>6</sup> Faculty of Forestry, University of Belgrade, Kneza Višeslava 1, 11030 Belgrade, Serbia

**Table S1.** Details of isolates from *Synchrospora* and related oomycete genera considered in the phylogenetic studies. GenBank numbers for sequences obtained in the present study are printed in *italics*.

| Species                                | Isolate codes <sup>1</sup> ; status <sup>2</sup>     | Origin                                   |                                                                                                   | GenBank accession numbers |                                                        |                                                        |
|----------------------------------------|------------------------------------------------------|------------------------------------------|---------------------------------------------------------------------------------------------------|---------------------------|--------------------------------------------------------|--------------------------------------------------------|
|                                        |                                                      | Host / habitat                           | Location; year; collector; reference <sup>3</sup>                                                 | ITS                       | LSU<br><i>βtub</i>                                     | <i>cox1</i><br><i>cox2</i>                             |
| <i>Aphanomyces euteiches</i>           | ATCC 201684 = pea isolate                            | Root of <i>Pisum sativum</i>             | Denmark; Funen; A.B. Petersen; Gaulin <i>et al.</i> 2018                                          | OMPI01000392 <sup>3</sup> | OMPI01000392 <sup>4</sup><br>OMPI01000009 <sup>4</sup> | OMPI01000379 <sup>4</sup><br>OMPI01000379 <sup>4</sup> |
| <i>Calycofera cryptica</i>             | NBRC 32865; T                                        | Yellow leaf of <i>Avicennia</i> sp.      | Belize; 1996; n.a.; Bennett <i>et al.</i> 2017a                                                   | KY604972                  | KY604972<br>n.a.                                       | KY604975<br>MF598483                                   |
| <i>C. operculata</i>                   | ATCC 44952 = CBS 241.83 = IMI 249911 = NBRC 32629; T | Decaying leaf of <i>Avicennia marina</i> | Australia, Moreton Bay; 1980; K.G. Pegg & J.L. Alcorn; Bennett <i>et al.</i> 2017                 | KJ128038                  | JX115217<br>n.a.                                       | KF853238<br>MF598482                                   |
| <i>Elongisporangium anandrum</i>       | CBS 285.31; A/T                                      | <i>Rheum rhaponticum</i>                 | USA; C. Drechsler; Robideau <i>et al.</i> 2011                                                    | HQ643435                  | HQ665185<br>JAADXR010000031 <sup>4</sup>               | HQ708482<br>AB362328                                   |
| <i>E. helicandrum</i>                  | CBS 393.54; A                                        | <i>Rumex acetosella</i>                  | USA; n.a.; C. Drechsler; Lévesque & de Cock 2004                                                  | HQ643548                  | HQ665225<br>KJ595453                                   | HQ708592<br>AB362329                                   |
| <i>E. prolatum</i>                     | CBS 845.68; T                                        | <i>Rhododendron</i> sp.                  | USA, Georgia; n.a.; W.A. Campbell; Lévesque & de Cock 2004                                        | HQ643754                  | HQ665303<br>JAADVW010000542 <sup>4</sup>               | HQ708795<br>AB362330                                   |
| <i>E. senticosum</i>                   | CBS122490                                            | Soil, deciduous broadleaf forest         | Japan, Takayama; 2009; Senda & Kageyama; Nguyen <i>et al.</i> 2022                                | HQ643773                  | HQ665093<br>JAADVQ010000246 <sup>4</sup>               | HQ708814<br>AB362317                                   |
| <i>E. undulatum</i>                    | CBS 157.69 = IMI 323158                              | Soil under <i>Pinus</i> sp.              | USA, Alabama; 1968; W.A. Campbell; Robideau <i>et al.</i> 2011                                    | HQ643946                  | HQ665134<br>JAADV010000028 <sup>4</sup>                | HQ708987<br>KJ595348                                   |
| <i>Globisporangium attrantheridium</i> | DAOM 230383                                          |                                          |                                                                                                   | HQ643477                  | HQ665308<br>AB512819                                   | HQ708524<br>AB512886                                   |
| <i>G. middletonii</i>                  | CBS 528.74                                           | Soil                                     | The Netherlands; n.a.                                                                             | AY598640                  | AY598640<br>KJ595457                                   | HQ708738<br>AB362318                                   |
| <i>G. minus</i>                        | CBS 226.88                                           | Soil                                     | UK, Berkshire; n.a.; G. Clark; Lévesque & de Cock 2004                                            | HQ643696                  | HQ665168<br>KJ595446                                   | HQ708740<br>AB362320                                   |
| <i>G. multisporum</i>                  | CBS 470.50; T                                        | Soil                                     | USA, Illinois; A.W. Poitras; Lévesque & de Cock 2004                                              | AY598641                  | HQ665239<br>KJ595455                                   | HQ708744<br>AB362319                                   |
| <i>G. paroecandrum</i>                 | CBS 157.64 = BPIC 1297                               | Loamy nursery soil                       | South Australia, Adelaide; 1962; O. Vaartaja; Uzuhashi <i>et al.</i> 2010                         | AY598644                  | AY598644<br>JAASFU010000644 <sup>4</sup>               | HQ708772<br>DQ071391                                   |
| <i>G. rostratum</i>                    | CBS 533.74 = BR 649 = DAOM 229266                    | Soil                                     | The Netherlands, Oostelijk Flevoland; 1971; A.J. van der Plaats-Niterink; Lévesque & de Cock 2004 | AY598696                  | HQ665252<br>KJ595512                                   | HQ708808<br>KJ595388                                   |
| <i>G. spinosum</i>                     | CBS 275.67                                           | Compost                                  | The Netherlands, Baarn; n.a.; A.J. van der Plaats-Niterink; Lévesque & de Cock 2004               | AY598701                  | HQ665181<br>JAADVN010000284 <sup>4</sup>               | HQ708834<br>KJ595366                                   |

| Species                                           | Isolate codes <sup>1</sup> ; status <sup>2</sup>  | Origin                                                                    | GenBank accession numbers                                                 |          |                      |                            |
|---------------------------------------------------|---------------------------------------------------|---------------------------------------------------------------------------|---------------------------------------------------------------------------|----------|----------------------|----------------------------|
|                                                   |                                                   | Host / habitat                                                            | Location; year; collector; reference <sup>3</sup>                         | ITS      | LSU<br><i>βtub</i>   | <i>cox1</i><br><i>cox2</i> |
| <i>G. splendens</i>                               | CBS 462.48                                        | n.a.                                                                      | USA; n.a.; J.T. Middleton; Lévesque & de Cock 2004                        | HQ643795 | AY598655<br>AB512852 | HQ708836<br>AB512921       |
| <i>G. ultimum</i>                                 | CBS122650                                         | n.a.                                                                      | France; n.a.; B. Paul; n.a.                                               | HQ643864 | HQ665103<br>KJ639291 | HQ708905<br>KJ639199       |
| <i>Halophytophthora avicennae</i>                 | BD635                                             | Baiting; Rio Séqua estuary, Ria Formosa                                   | Portugal, Tavira; 2015; T. Jung; Maia <i>et al.</i> 2022                  | OK033633 | OK033575<br>OK091253 | OK091198<br>OQ605397       |
| <i>H. celeris</i>                                 | CBS 147240 = BD885; T                             | Baiting; tidal channel in salt marsh, Ria Formosa                         | Portugal, Santa Luzia; 2015; T. Jung; Maia <i>et al.</i> 2022             | OK033645 | OK033587<br>OK091266 | OK091210<br>OQ605398       |
| <i>H. lusitanica</i>                              | CBS 147231 = BD686; T                             | Baiting; tidal pond in salt marsh, Ria Formosa                            | Portugal, Almancil; 2015; T. Jung; Maia <i>et al.</i> 2022                | OK033663 | OK033605<br>OK091284 | OK091228<br>OQ605400       |
| <i>H. macrosporangia</i>                          | CBS 147290 = BD639; T                             | Baiting; tidal channel in salt marsh, Ria Formosa                         | Portugal, Santa Luzia; 2015; T. Jung; Maia <i>et al.</i> 2022             | OK033664 | OK033606<br>OK091285 | OK091229<br>OQ605401       |
| <i>H. sinuata</i>                                 | CBS 147237 = BD656; T                             | Baiting; tidal pond in salt marsh, Ria Formosa                            | Portugal, Santa Luzia; 2015; T. Jung; Maia <i>et al.</i> 2022             | OK033671 | OK033613<br>OK091293 | OK091236<br>OQ605402       |
| <i>H. thermoambigua</i>                           | CBS 147229 = BD651; T                             | Baiting; tidal pond in salt marsh, Ria Formosa                            | Portugal, Santa Luzia; 2015; T. Jung; Maia <i>et al.</i> 2022             | OK033680 | OK033622<br>OK091300 | OK091244<br>OQ605403       |
| " <i>Halophytophthora</i> " <i>exoprolifera</i> " | ATCC 76607 = CBS 252.93 = AN-1065 = IFO 32420; PT | Fallen leaf of <i>Bruguiera gymnorhiza</i>                                | Japan, Okinawa; 1988; A. Nakagiri; Ho <i>et al.</i> 1992                  | HQ643132 | HQ665174<br>n.a.     | HQ708205<br>n.a.           |
| " <i>Halophytophthora</i> " <i>exoprolifera</i> " | JP1472                                            | Fallen leaf in mangrove stand                                             | Japan, Okinawa; 2018; T.Jung; this study                                  | OQ600172 | OQ600178<br>OQ605379 | OQ605386<br>OQ605399       |
| <i>Nothophytophthora amphigynosa</i>              | CBS 142348 = BD268; T                             | Stream baiting in atlantic forest                                         | Portugal, Sintra; 2015; T. Jung; Jung <i>et al.</i> 2017a                 | KY788382 | OK047739<br>KY788515 | OQ605387<br>OQ605404       |
| <i>N. caduca</i>                                  | CBS 142350 = CL328; T                             | Stream baiting in Valdivian rainforest                                    | Chile, Valdivia; 2014; T. Jung; Jung <i>et al.</i> 2017a                  | KY788401 | KY788470<br>KY788531 | OQ605388<br>OQ605405       |
| <i>N. chlamydospora</i>                           | CBS 142353 = CL316; T                             | Stream baiting in Valdivian rainforest                                    | Chile, Valdivia; 2014; T. Jung; Jung <i>et al.</i> 2017a                  | KY788405 | KY788450<br>KY788535 | OQ616982<br>OQ605406       |
| <i>N. intricata</i>                               | CBS 142354 = TJ275 = RK113-1s; T                  | Rhizosphere soil of <i>Aesculus hippocastanum</i>                         | Germany, Wiesbaden; 2011; T. Jung; Jung <i>et al.</i> 2017a               | KY788413 | OK047740<br>OQ605380 | OQ605389<br>OQ605407       |
| <i>N. irlandica</i>                               | CBS 147242 = PR13-109; T                          | Stream baiting                                                            | Ireland; 2014; R. O'Hanlon; O'Hanlon <i>et al.</i> 2021                   | MW364574 | MW364589<br>MW367157 | OQ605390<br>OQ605408       |
| <i>Phytophthora castaneae</i>                     | ATCC 36818 = CBS 587.85 = IMI 325914 = WPC P15598 | Soil                                                                      | Taiwan; n.a.; H.S. Chang; Robideau <i>et al.</i> 2011                     | MH620122 | KX251102<br>KX251098 | MN883602<br>MH551178       |
| <i>P. constricta</i>                              | CBS 125801 = CH 55C3 = TJ0306 = VHS 16130; T      | Kwongan heathland                                                         | Australia, WA; 2006; VHS; Rea <i>et al.</i> 2011, Jung <i>et al.</i> 2022 | ON000729 | ON000635<br>OM975908 | ON013795<br>OQ605409       |
| <i>P. infestans</i>                               | CBS147289 = TJ1504 = T30-4; ET                    | Laboratory cross between <i>Solanum tuberosum</i> strains 80029 and 88133 | The Netherlands; 1993; A. Drenth; Chen <i>et al.</i> 2022                 | MZ753914 | OQ600179<br>MZ736454 | MZ736428<br>OQ605410       |
| <i>P. gallica</i>                                 | CBS 111474 = CPHST BL35 = WPC P16826 = GAL1; T    | Rhizosphere soil of riparian <i>Quercus robur</i>                         | France; 1998; T. Jung; Jung <i>et al.</i> 2022                            | MG865497 | KX252594<br>KX252590 | MH136893<br>HM534964       |
| <i>P. pseudosyringae</i>                          | CBS 111772 = TJ1528 = WPC P10437 = PSEU6; T       | Rhizosphere soil of <i>Q. robur</i>                                       | Germany, Gerolzhofen; 1997; T. Jung; Chen <i>et al.</i> 2022              | AY230190 | KX250983<br>KX250979 | OQ605391<br>OQ605411       |
| <i>P. ×cambivora</i>                              | CBS141218 = IT 5-3 = TJ197; NT                    | Rhizosphere soil of <i>Quercus pubescens</i>                              | Italy, Sicily; 2013; T. Jung; Jung <i>et al.</i> 2017b                    | KU899179 | OK033630<br>KU899255 | MZ736422<br>OQ605412       |
| <i>Phytophthora boreale</i>                       | CBS 551.88                                        | Soil under <i>Brassica caulorapa</i>                                      | China; n.a.; Y. Yang-nian; Robideau <i>et al.</i> 2011                    | HQ643372 | HQ665261<br>EF408882 | HQ708419<br>EF408876       |
| <i>Ph. cucurbitacearum</i>                        | CBS 748.96 = IMI 333340                           | n.a.                                                                      | Australia, Northern Territory; 1989; J. Duff; De Cock <i>et al.</i> 2015  | HQ643381 | AY598667<br>KJ595460 | HQ708428<br>AB690680       |

| Species                             | Isolate codes <sup>1</sup> ; status <sup>2</sup> | Origin                                                  |                                                                                             | GenBank accession numbers |                                                        |                                                              |
|-------------------------------------|--------------------------------------------------|---------------------------------------------------------|---------------------------------------------------------------------------------------------|---------------------------|--------------------------------------------------------|--------------------------------------------------------------|
|                                     |                                                  | Host / habitat                                          | Location; year; collector; reference <sup>3</sup>                                           | ITS                       | LSU<br><i>βtub</i>                                     | <i>cox1</i><br><i>cox2</i>                                   |
| <i>Ph. helicoides</i>               | CBS 286.31; A/T                                  | <i>Phaseolus vulgaris</i>                               | USA; n.a.; C. Drechsler; Robideau <i>et al.</i> 2011                                        | HQ643383                  | HQ665186<br>JAADYE010000001 <sup>4</sup>               | HQ708430<br>DQ071377                                         |
| <i>Ph. litorale</i>                 | CBS 118360; T                                    | Soil of <i>Phragmites australis</i>                     | Germany, Lake Constance; 2003; J. Nechwatal; De Cock <i>et al.</i> 2015                     | HQ643386                  | HQ665082<br>JAADYB010001007 <sup>4</sup>               | HQ708433<br>KJ595418                                         |
| <i>Ph. mercuriale</i>               | CBS 122443 = STE-U 6204; T                       | Rhizosphere of <i>Macadamia integrifolia</i>            | South Africa, Limpopo Province; n.a.; W.J. Botha; De Cock <i>et al.</i> 2015                | AB725882                  | KF853236<br>KJ595466                                   | KF853239<br>AB690666                                         |
| <i>Ph. oedochilum</i>               | CBS 292.37; A                                    | –                                                       | USA; n.a.; C. Drechsler; Robideau <i>et al.</i> 2011                                        | HQ643392                  | JAADXX010000902 <sup>4</sup><br>EF408883               | JAADXX010000773 <sup>4</sup><br>JAADXX010000773 <sup>4</sup> |
| <i>Ph. ostracodes</i>               | CBS 768.73                                       | Clay soil                                               | Spain, Ibiza; 1972; A.J. van der Plaats-Niterink; Robideau <i>et al.</i> 2011               | HQ643395                  | AY598663<br>EF408880                                   | HQ708442<br>AB108013                                         |
| <i>Ph. vexans</i>                   | CBS 119.80 = BR 484                              | Soil                                                    | Iran; 1985; D. Ershad; De Cock <i>et al.</i> 2015                                           | HQ643400                  | HQ643400<br>JAADXV010000033 <sup>4</sup>               | HQ708447<br>GU133518                                         |
| <i>Pilasporangium apinafurcum</i>   | NBRC 105194 = MAFF 241059 = UZ300 ;T             | Uncultivated soil                                       | Japan, Wakayama; n.a.; n.a.; Uzuhashi <i>et al.</i> 2010                                    | AB458660                  | AB458651<br>BCKD01000092 <sup>4</sup>                  | MAFF 241059 CoxI <sup>5</sup><br>AB458820                    |
| <i>Pi. apinafurcum</i>              | NBRC 105195 = MAFF 241060 = UZ301                | Uncultivated soil                                       | Japan, Wakayama; n.a.; n.a.; Uzuhashi <i>et al.</i> 2010                                    | AB458657                  | AB458652<br>BCKE01000081 <sup>4</sup>                  | MAFF 241060 CoxI <sup>5</sup><br>AB458818                    |
| <i>Pythium angustatum</i>           | CBS 522.74                                       | Soil                                                    | The Netherlands, Oostelijk Flevoland; A.J. van der Plaats-Niterink; Lévesque & de Cock 2004 | HQ643437                  | AY598623<br>JAADXQ010000849 <sup>4</sup>               | HQ708484<br>KJ595387                                         |
| <i>Py. aphanidermatum</i>           | CBS 118.80                                       | n.a.                                                    | n.a.; 1966; E. Laville; Lévesque & de Cock 2004                                             | HQ643438                  | AY598622<br>JAADXP010001025 <sup>4</sup>               | HQ708485<br>JAADXP010000623 <sup>4</sup>                     |
| <i>Py. conidiophorum</i>            | CBS 223.88 = APCC 4005a                          | Soil                                                    | UK, Berkshire; n.a.; G. Clark; Lévesque & de Cock 2004                                      | AY598629                  | HQ665166<br>KJ595486                                   | HQ708555<br>KJ595361                                         |
| <i>Py. deliense</i>                 | ATCC 12280 = CBS 314.33; A/T                     | Necrotic stem of <i>Nicotiana tabacum</i>               | Indonesia, Sumatra; 1932; A. Meurs; Lévesque & de Cock 2004                                 | HQ643522                  | HQ665204<br>KJ595497                                   | HQ708568<br>KJ595372                                         |
| <i>Py. insidiosum</i>               | ATCC 58643 = CBS 574.85 = CDC B-4296; T          | Horse                                                   | Costa Rica; before 1985; L. Mendoza; Robideau <i>et al.</i> 2011                            | HQ643570                  | HQ665273<br>KJ595515                                   | HQ708614<br>AF196597                                         |
| <i>Py. myriotylum</i>               | CBS 254.70                                       | <i>Arachis hypogaea</i>                                 | Israel; n.a.; Z.R. Frank; Lévesque & de Cock 2004                                           | HQ643701                  | AY598678<br>JAADWI010000209 <sup>4</sup>               | HQ708745<br>KJ595365                                         |
| <i>Py. oligandrum</i>               | CBS 382.34                                       | Root of <i>Viola sp.</i>                                | UK; n.a.; C.G.C. Chesters; Robideau <i>et al.</i> 2011                                      | HQ643715                  | HQ665223<br>JAADWG010000248 <sup>4</sup>               | HQ708759<br>KJ595381                                         |
| <i>Py. vanterpoolii</i>             | CBS 295.37; T                                    | Root and stem base of <i>Triticum aestivum</i>          | UK; 1936; T.C. Vanterpool; Robideau <i>et al.</i> 2011                                      | HQ643952                  | HQ665193<br>JAADVD010000154 <sup>4</sup>               | HQ708993<br>JAADVD010000820 <sup>4</sup>                     |
| <i>Saprolegnia parasitica</i>       | CBS 223.65 = IMI 268364                          | Young <i>Esox lucius</i>                                | The Netherlands; 1965; A.J. van der Plaats-Niterink; n.a.                                   | ADCG02001922 <sup>4</sup> | ADCG02001922 <sup>4</sup><br>ADCG02000918 <sup>4</sup> | ADCG02004126 <sup>4</sup><br>ADCG02004126 <sup>4</sup>       |
| <i>Synchytrium medusiformis</i>     | CBS 149011 = PA229; T                            | Fallen leaf, tropical cloud forest                      | Panama, Volcano Baru; 2019; K. Broders & Y. Balci; this study                               | OQ600177                  | OQ600184<br>OQ605385                                   | OQ605396<br>OQ605417                                         |
| <i>S. medusiformis</i>              | PA228                                            | Fallen leaf, tropical cloud forest                      | Panama, Volcano Baru; 2019; K. Broders & Y. Balci; this study                               | OQ600173                  | OQ600180<br>OQ605381                                   | OQ605392<br>OQ605413                                         |
| <i>S. medusiformis</i>              | PA230                                            | Fallen leaf, tropical cloud forest                      | Panama, Volcano Baru; 2019; K. Broders & Y. Balci; this study                               | OQ600174                  | OQ600181<br>OQ605382                                   | OQ605393<br>OQ605414                                         |
| <i>S. medusiformis</i>              | PA231                                            | Fallen leaf, tropical cloud forest                      | Panama, Volcano Baru; 2019; K. Broders & Y. Balci; this study                               | OQ600175                  | OQ600182<br>OQ605383                                   | OQ605394<br>OQ605415                                         |
| <i>S. medusiformis</i>              | PA232                                            | Fallen leaf, tropical cloud forest                      | Panama, Volcano Baru; 2019; K. Broders & Y. Balci; this study                               | OQ600176                  | OQ600183<br>OQ605384                                   | OQ605395<br>OQ605416                                         |
| <i>Synchytrium sp.</i> <sup>6</sup> | E14413A                                          | Stem, <i>Croton alnifolius</i> in tropical cloud forest | Ecuador, Mindo; n.a.; n.a.; n.a.                                                            | KM265501                  | n.a.                                                   | n.a.                                                         |

n.a. = not available.

<sup>1</sup> Abbreviations of isolates and culture collections: ATCC = American Type Culture Collection, Manassas, USA; BD, CL and TJ: Dr Thomas Jung's personal culture collection, housed at Mendel University in Brno, Czech Republic and the University of Algarve, Faro, Portugal; CBS = CBS collection at the Westerdijk Fungal Biodiversity Institute, Utrecht, Netherlands; CH: Chuanxue Hong laboratory at Virginia Polytechnic Institute and State University, Virginia Beach, VA, USA; CPHST BL: USDA-APHIS-PPQ-Center for Plant Health, Science & Technology-Beltsville Laboratory, Beltsville, MD, USA; IMI: CABI Biosciences, UK; JP, PA: Culture collection of Mendel University in Brno, Czech Republic; DAOM = Canadian National Mycological Herbarium, Agriculture and Agri-Food Canada, Ottawa, Canada; IFO = Institute for Fermentation, Osaka, Japan; MAFF: Research Center of Genetic Resources, NARO, Tsukuba, Japan; NBRC: NITE Biological Resource Center, Tokyo, Japan; VHS: Vegetation Health Service Collection, Department of Environment and Conservation, Perth, Australia; WPC = World Phytophthora Collection, University of California Riverside, USA; other isolate names and numbers are as given by the collectors and on GenBank, respectively.

<sup>2</sup> T, ex-type strain; ET, ex-epitype strain; NT, ex-neotype strain; PT, ex-paratype strain; A, authentic strain, identified by the author of the species; A/T, authentic strain, probably used for original description.

<sup>3</sup> References:

Bennett, R.M.; de Cock, A.W.A.M.; Lévesque, A.; Thines, M. *Calycofera* gen. nov., an estuarine sister taxon to *Phytopythium*, Peronosporaceae. *Mycol. Prog.* **2017**, *16*, 947–954.

Chen, Q., Bakhshi, M., Balci, Y., Broders, K.D., Cheewangkoon, R., Chen, S.F., Fan, X.L., Gramaje, D., Halleen, F., Horta Jung, M., et al. (2022). Genera of phytopathogenic fungi: GOPHY 4. *Stud. Mycol.* **2022**, *101*, 417–564.

de Cock, A.W.A.M.; Lodhi, A.M.; Rintoul, T.L.; Bala, K.; Robideau, G.P.; Abad, Z.G.; Coffey, M.D.; Shahzad, S.; Lévesque, C.A. *Phytopythium*: molecular phylogeny and systematics. *Persoonia* **2015**, *34*, 25–39.

Gaulin, E.; Pel, M.J.C.; Camborde, L.; San-Clemente, H.; Courbier, S.; Dupouy, M.-A.; Lengellé, J.; Veyssiere, M.; Le Ru, A., Grandjean, F.; et al. Genomics analysis of *Aphanomyces* spp. identifies a new class of oomycete effector associated with host adaptation. *BMC Biology* **2018**, *16*, 43.

Ho, H.H.; Nakagiri, A. A new species of *Halophytophthora* from Atlantic and Pacific subtropical islands. *Mycologia* **1992**, *84*, 548–554.

Jung, T.; Scanu, B.; Bakonyi, J.; Seress, D.; Kovács, G.M.; Durán, A.; Sanfuentes von Stowasser, E.; Schena, L.; Mosca, S.; Thu, P.Q.; et al. *Nothophytophthora* gen. nov., a new sister genus of *Phytophthora* from natural and semi-natural ecosystems. *Persoonia* **2017a**, *39*, 143–174.

Jung, T., Horta Jung, M.; Scanu, B.; Seress, D.; Kovács, D.M.; Maia, C.; Pérez-Sierra, A.; Chang, T.-T.; Chandelier, A.; Heungens, A.; et al. Six new *Phytophthora* species from ITS Clade 7a including two sexually functional heterothallic hybrid species detected in natural ecosystems in Taiwan. *Persoonia* **2017b**, *38*, 100–135.

Jung, T.; Milenković, I.; Corcobado, T.; Májek, T.; Janoušek, J.; Kudláček, T.; Tomšovský, M.; Nagy, Z.; Durán, A.; Tarigan, M.; et al. Extensive morphological and behavioural diversity among fourteen new and seven described species in *Phytophthora* Clade 10 and its evolutionary implications. *Persoonia* **2022**, *49*, 1–57.

Lévesque, C.A.; de Cock, A.W.A.M. Molecular phylogeny and taxonomy of the genus *Pythium*. *Mycol. Res.* **2004**, *108*, 1363–1383.

Maia, C.; Horta Jung, M.; Carella, G.; Milenković, I.; Janoušek, J.; Tomšovský, M.; Mosca, S.; Schena, L.; Cravador, A.; Moricca, S.; et al. Eight new *Halophytophthora* species from marine and brackish-water ecosystems in Portugal and an updated phylogeny for the genus. *Persoonia* **2022**, *48*, 54–90.

Nguyen, H.D.T.; Dodge, A.; Dadej, K.; Rintoul, T.L.; Ponomareva, E.; Martin, F.N.; de Cock, A.W.A.M.; Lévesque, C.A.; Redhead, S.A.; Spies, C.F.J. Whole genome sequencing and phylogenomic analysis show support for the splitting of genus *Pythium*. *Mycologia* **2022**, *114*, 501–515.

O'Hanlon, R.; Destefanis, M.; Milenković, I.; Tomšovský, M.; Janoušek, J.; Bellgard, S.E.; Weir, B.S.; Kudláček, T.; Horta Jung, M.; Jung, T. Two new *Nothophytophthora* species from streams in Ireland and Northern Ireland: *Nothophytophthora irlandica* and *N. lirii* sp. nov. *PLoS ONE* **2021**, *16*, e0250527.

Rea, A.J.; Burgess, T.I.; Hardy, G.E.St.J.; Stukely, M.J.C.; Jung, T. Two novel and potentially endemic species of *Phytophthora* associated with episodic dieback of kwongan vegetation in the south-west of Western Australia. *Plant Pathol.* **2011**, *60*, 1055–1068.

Robideau, G.P.; de Cock, A.W.A.M.; Coffey, M.D.; Voglmayr, H.; Brouwer, H.; Bala, K.; Chitty, D.W.; Désaulniers, N.; Eggertson, Q.A.; Gachon, C.M.M.; et al. DNA barcoding of oomycetes with cytochrome c oxidase subunit I and internal transcribed spacer. *Mol. Ecol. Resour.* **2011**, *11*, 1002–1011.

Uzuhashi, S.; Tojo, M.; Kakishima, M. Phylogeny of the genus *Pythium* and description of new genera. *Mycoscience* **2010**, *51*, 337–365.

<sup>4</sup> Genome sequence sourced from the GenBank Whole-Genome Shotgun contigs.

<sup>5</sup> Sequences retrieved from the website “GeneBank Project, NARO” ([https://www.gene.afrc.go.jp/databases-micro\\_search\\_en.php](https://www.gene.afrc.go.jp/databases-micro_search_en.php), accessed on 24 April 2023).

<sup>6</sup> Submitted to GenBank as Fungal sp. E14413A.
